# Supplementary material
Source: PubMed Central journal article supplement (PMC3725066)
Supplement: 1302856110_pnas.201302856SI.pdf [file 1302856110_pnas.201302856SI.pdf]

# Supporting Information

Shin et al. 10.1073/pnas.1302856110

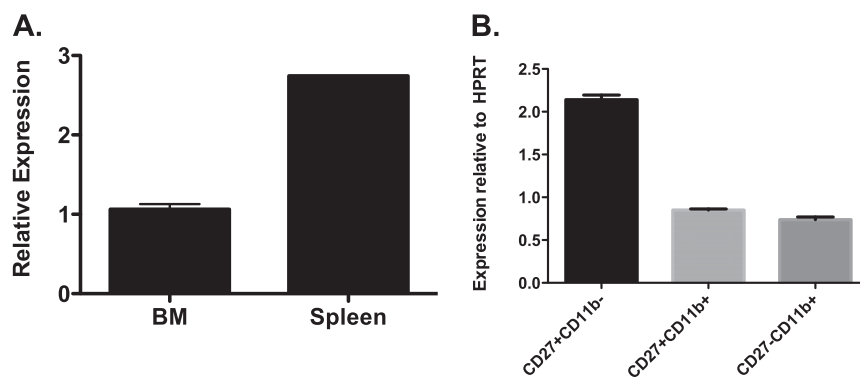

**Fig. S1.** Aryl hydrocarbon receptor (*AhR*) expression in mouse natural killer (NK) cells. (A) NK (NKp46<sup>+</sup>CD3<sup>-</sup>) cells were sorted by FACS from WT mice bone marrow (BM) and spleen to high purity, and *AhR* expression was assessed by Taqman quantitative RT-PCR (qRT-PCR). (B) CD27/CD11b subsets of NK (NKp46<sup>+</sup>CD3<sup>-</sup>) cells were sorted by FACS from WT spleens to high purity, and *AhR* expression was assessed by Taqman qRT-PCR. Results in this figure were reproduced at least once.

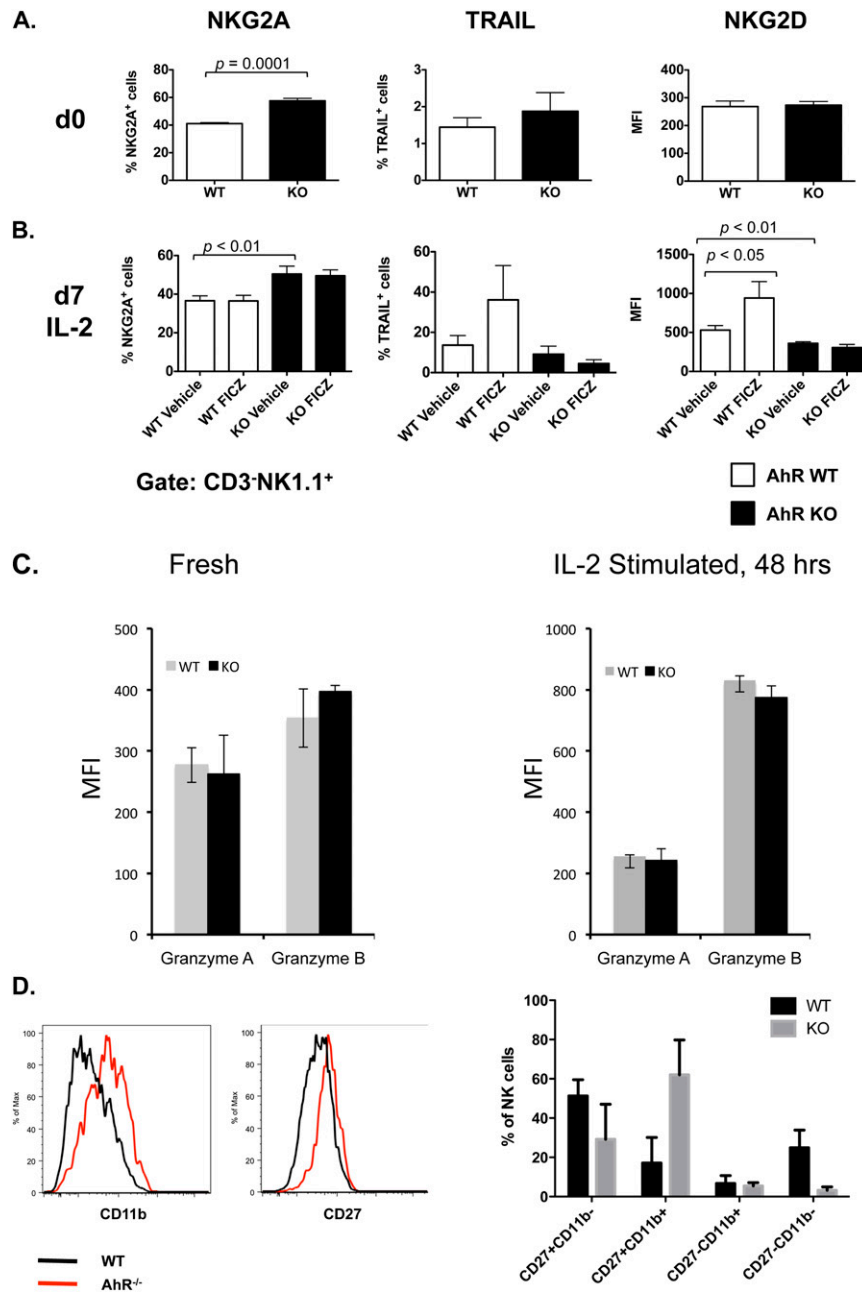

**Fig. 52.** Profiling of NK cells from AhR<sup>-/-</sup> mice. (A and B) Splenic NK cells from AhR<sup>-/-</sup> and AhR<sup>+/+</sup> mice were enriched by magnetic bead negative selection and cultured in IL-2 (1,000 U/mL) for 7 d, either in the presence of 6-formylindolo[3,2-b]carbazole (FICZ) (200 nM) or vehicle control. The NK cells (NK1.1<sup>+</sup>CD3<sup>-</sup>) were analyzed for NKG2A, TRAIL, and NKG2D by FACS on day 0 and day 7. (C) Intracellular staining of Granzyme A and B and FACS analysis was performed on splenocytes from 12- to 16 wk-old AhR<sup>+/+</sup> and AhR<sup>-/-</sup> mice immediately after harvesting (fresh) and after 48 h in culture with IL-2 (1,000 U/mL). Gate, CD3<sup>-</sup>NK1.1<sup>+</sup>. (D) NK (NK1.1<sup>+</sup>CD3<sup>-</sup>) cells were isolated by negative isolation from the spleens of AhR<sup>-/-</sup> and AhR<sup>+/+</sup> mice and cultured in 1,000 U/mL IL-2. Cells were analyzed for CD27 and CD11b expression by FACS on day 11 (*n* = 3 mice per condition). Results in this figure were reproduced at least once.

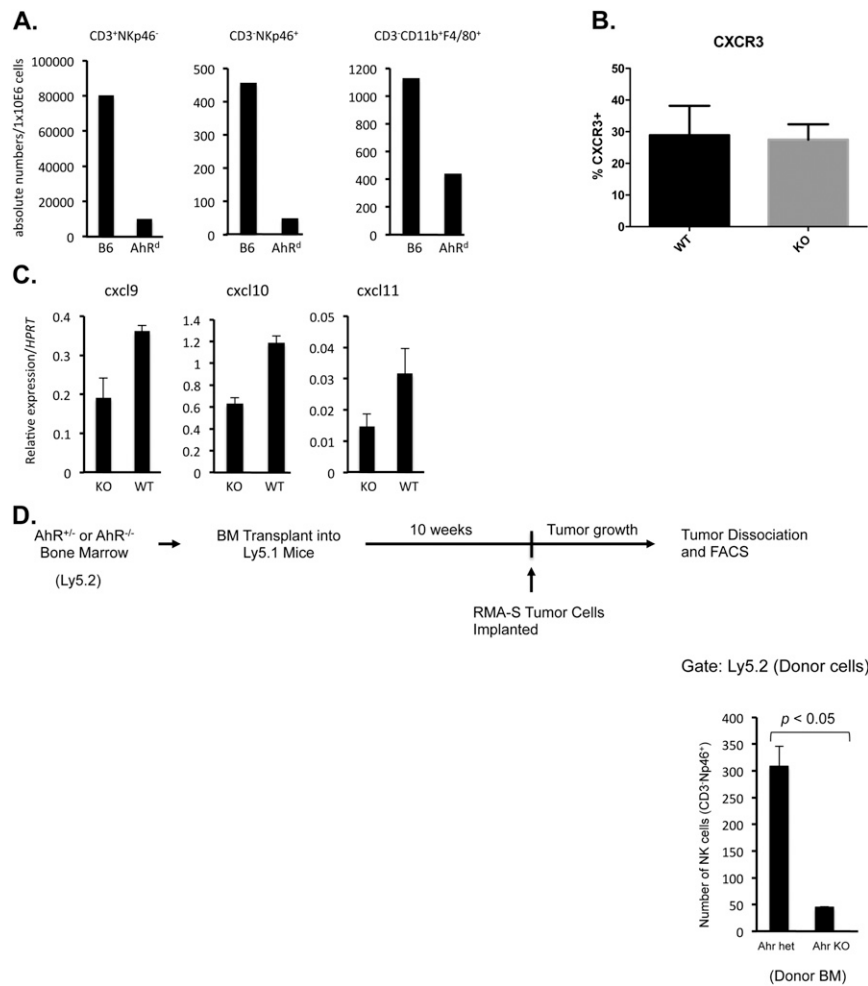

**Fig. S3.** Increased tumor growth in AhR-deficient mice is correlated with a decrease in tumor infiltrating lymphocytes. (A) RMA-S tumors established in WT and AhR<sup>d</sup> mice were dissociated and stained with CD3, NKp46, CD11b, and F4/80 antibodies. The absolute numbers of each population were analyzed with flow cytometry. (B) PBMCs were isolated from the blood of non-tumor-bearing adult AhR<sup>-/-</sup> and AhR<sup>+/+</sup> mice, and unstimulated NK cells (NK1.1<sup>+</sup>CD3<sup>-</sup>) were analyzed for CXCR3 expression by FACS. *n* = 4 mice per group. (C) RMA-S tumors were established in AhR<sup>-/-</sup> and AhR<sup>+/+</sup> mice, and cDNA was synthesized from RNA preparations of the tumors. Chemokine expression was assessed by qRT-PCR, normalized to *Hprt* expression. (D) BM cells (10<sup>7</sup>) from AhR<sup>+/+</sup> or AhR<sup>-/-</sup> mice (Ly5.2) were transplanted i.v. into irradiated (10 Gy) C57BL/6 (B6) Ly5.1-congenic mice. After 10 wk, the recipients were implanted s.c. over the flanks with RMA-S tumor cells (5 × 10<sup>4</sup> cells per mouse). After tumors formed, the tumors were harvested, dissociated, stained for Ly5.2, CD3, and NKp46, and analyzed by FACS. *n* = 3 per cohort. Results were reproduced at least once.

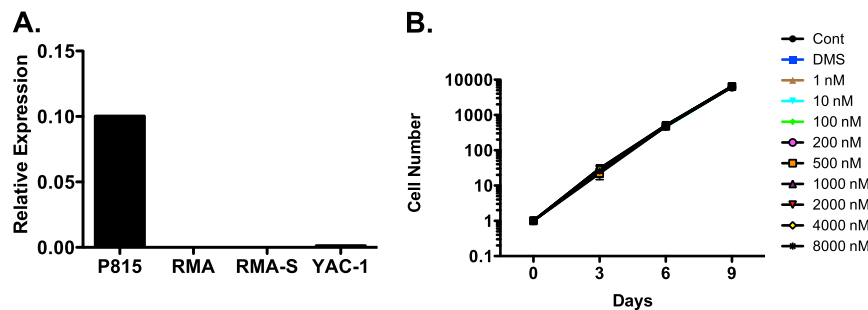

**Fig. S4.** RMA-S cells do not express AhR and are not affected by FICZ. (A) *AhR* expression was assessed by qRT-PCR in P815, RMA, RMA-S, and Yac-1 cells, normalized to *Hprt* expression. (B) RMA-S cells were cultured in various concentrations of FICZ, and cell proliferation was assessed by cell counting of the cultured cells.

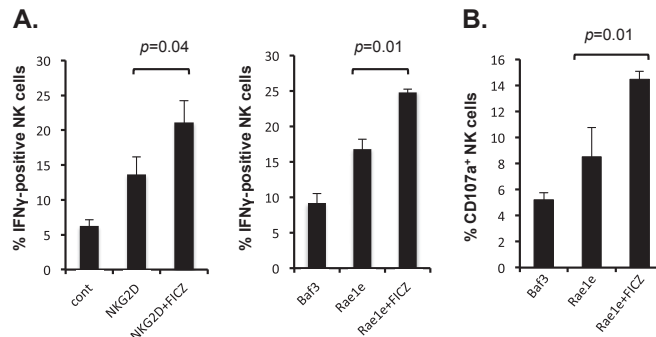

**Fig. 55.** FICZ enhances NKG2D-mediated NK cell activation. (A) Splenocytes from Rag1<sup>-/-</sup> mice, injected i.p. with either FICZ (3  $\mu$ g per mouse, i.p.) or vehicle control, were cultured on anti-NKG2D antibody (A10; eBioscience)-coated plates or with Baf cells stably transfected with Rae1 $\epsilon$ , for 8 h (ratio 1:1). IFN- $\gamma$  production was assessed by intracellular cytokine staining and FACS analysis, similar to Fig. 4. Baf3, parental Baf3 cells; NKG2D, anti-NKG2D antibody and vehicle control i.p. treatment; NKG2D+FICZ, anti-NKG2D antibody and FICZ i.p. treatment; Rae1 $\epsilon$ , Baf3-Rae1 $\epsilon$  transfectant and vehicle control i.p. treatment; Rae1 $\epsilon$  + FICZ, Baf3-Rae1 $\epsilon$  transfectant and FICZ i.p. treatment. (B) Splenocytes from WT mice, treated i.p. with FICZ (3  $\mu$ g per mouse, i.p.) or vehicle control, were incubated 1:1 with Baf3-Rae1 $\epsilon$  transfectant with or without FICZ, as in A, and stained for CD107a surface expression. Gate is on NK1.1<sup>+</sup>CD3<sup>-</sup> cells.

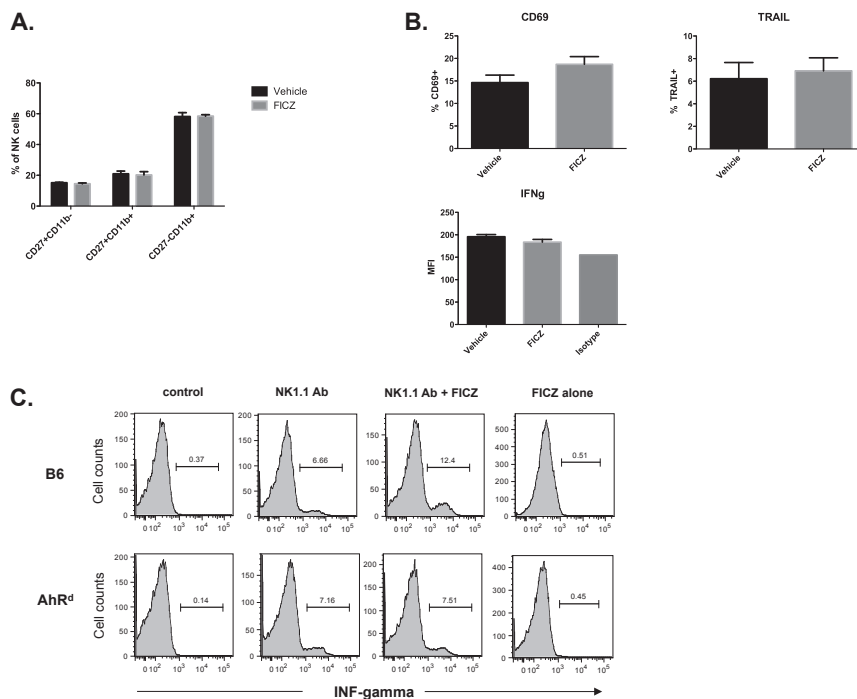

**Fig. 56.** No effect of FICZ alone on naïve NK cell maturation and activation markers and IFN- $\gamma$  production. (A) Adult WT mice were injected with 3  $\mu$ g of FICZ per mouse or vehicle control. Spleens were harvested at 48 h. NK cells (CD3-NK1.1<sup>+</sup>) were analyzed by FACS for surface expression of CD27 and CD11b ( $n = 3$  mice per group). (B) Splenocytes from mice treated, as in A, were analyzed for CD69 and TRAIL expression ( $n = 3$  mice per group), or were incubated with Monensin for 4 h, and then NK cells (CD3-NK1.1<sup>+</sup>) were assessed by FACS for intracellular staining of IFN- $\gamma$  ( $n = 3$  mice per group). (C) Splenocytes from B6 and AhR<sup>d</sup> mice were stimulated ex vivo with plate-bound anti-NK1.1 antibody in the absence and presence of FICZ and stained for intracellular IFN- $\gamma$ , and analyzed by FACS. Gate: DAPI<sup>-</sup>CD3<sup>-</sup>NKp46<sup>+</sup>.
